# Supplementary material for: Identification of Candidate miRNA Biomarkers for Glaucoma
Source: PubMed Central journal article supplement — Invest Ophthalmol Vis Sci. 2019 Jan;60(1):134–46. doi: 10.1167/iovs.18-24878 (PMC6329203; doi:10.1167/iovs.18-24878), 2019-01
Supplement: iovs-59-15-03_s02.pdf [file iovs-59-15-03_s02.pdf]

# WORKFLOW

# of MiRNAs

|                 |
|-----------------|
| Available       |
| Selected        |
| Quality Control |

1800 miRNAs analyzed on MIHS-3218Z

604 miRNAs present in all 3 samples of any group (glaucoma or cataract)

|    |                                                                                                                   |
|----|-------------------------------------------------------------------------------------------------------------------|
| 10 | Lowest overall standard deviation across all samples                                                              |
| 10 | Lowest standard deviation within any group                                                                        |
| 15 | Highest overall abundance in the eye                                                                              |
| 15 | Highest abundance by any group in the eye                                                                         |
| 94 | All pairwise comparisons between cataract and glaucoma (with $p < 0.10$ and $-1.25 < \text{Fold Change} < 1.25$ ) |
| 96 | Fold change $>5$ between groups                                                                                   |
| 66 | Stable between groups (Fold $< 0.2$ )                                                                             |
| 46 | Low single-group standard deviation ( $<0.25$ )                                                                   |
| 9  | miRNAs that were absent in only 1 group                                                                           |
| 11 | Other miRNAs of interest, selected to fill the available remaining spaces                                         |
| 12 | Standard quality control and replicate wells                                                                      |

**Figure S1. Custom miRNA PCR array development.** Flowchart of inclusion criteria from a pilot data set from  $n=9$  AqH samples (6 patients, 3 controls) quantified with MIHS-3218Z. Custom miRNA PCR array development.

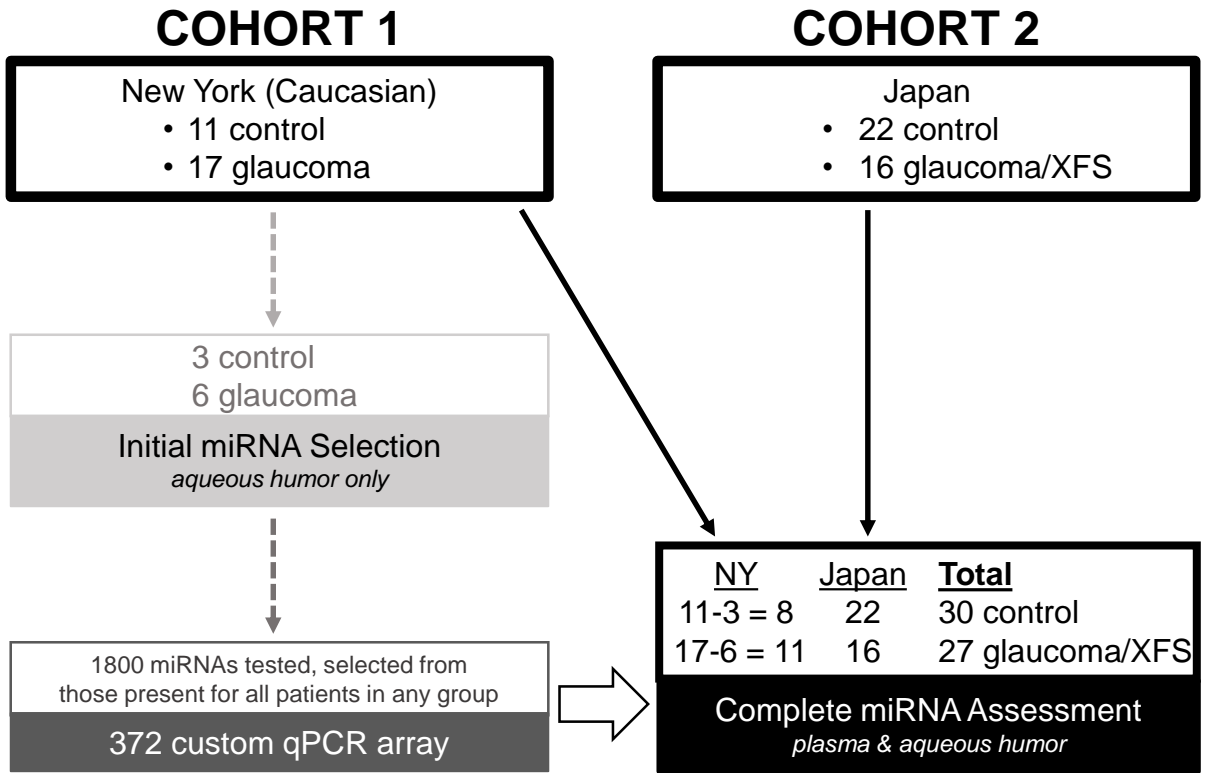

Figure S2. Flow diagram of patient inclusion in discovery and validation analyses.
